# Supplementary material for: Altruism in eWOM: Propensity to Write Reviews on Hotel Experience
Source: MDPI journal article supplement (doi:10.3390/jtaer18040113), 2023-12-13
Supplement: s1 [file s1]

## **Supplementary file (Tables)**

Altruism in eWOM: propensity to write reviews on hotel experience

### **Table of contents:**

#### **A: Descriptive statistics**

**Table S1.** Means, standard deviations, skew and kurtosis

#### **B: Factor Analysis Q2**

**Table S2.** Correlation matrix Q2

**Table S3.** KMO and Bartlett's Test Q2

**Table S4.** Communalities Q2

**Table S5.** Total Variance Explained Q2

#### **C: Factor Analysis Q3**

**Table S6.** Correlation matrix Q3

**Table S7.** KMO and Bartlett's Test Q3

**Table S8.** Communalities Q3

**Table S9.** Total Variance Explained Q3

#### **D: Mediating effects**

**Table S10.** Model between Q1 and Q4

**Table S11.** Path Analysis of mediation model (Q2\_F1)

**Table S12.** Path Analysis of mediation model (Q3\_F1)

#### **E: Moderating effects**

**Table S13.** Moderating effect of age

**Table S14.** Moderating effect of gender

“These materials have been supplied by the authors to aid in the understanding of their paper.”

### A: Descriptive statistics

**Table S1.** Means, standard deviations, skew and kurtosis.

|                    | N   | Mean | Std.<br>Deviation | Skewness | Kurtosis |
|--------------------|-----|------|-------------------|----------|----------|
| Q1                 | 739 | 2,97 | 0,68              | -0,219   | -0,107   |
| Q2.1               | 739 | 3,56 | 1,229             | -0,432   | -0,787   |
| Q2.2               | 739 | 3,89 | 1,044             | -0,699   | -0,115   |
| Q2.3               | 739 | 3,87 | 1,052             | -0,787   | 0,104    |
| Q2.4               | 739 | 3,33 | 1,217             | -0,340   | -0,770   |
| Q2.5               | 739 | 3,65 | 1,030             | -0,510   | -0,168   |
| Q2.6               | 739 | 3,21 | 1,286             | -0,204   | -1,035   |
| Q2.7               | 739 | 3,79 | 1,214             | -0,799   | -0,309   |
| Q3.1               | 739 | 7,34 | 2,430             | -0,646   | -0,381   |
| Q3.2               | 739 | 7,54 | 2,375             | -0,936   | 0,332    |
| Q3.3               | 739 | 6,90 | 2,443             | -0,675   | -0,160   |
| Q3.4               | 739 | 7,06 | 2,460             | -0,708   | -0,205   |
| Q3.5               | 739 | 6,62 | 2,509             | -0,456   | -0,586   |
| Q3.6               | 739 | 4,23 | 2,968             | 0,433    | -1,093   |
| Q3.7               | 739 | 4,31 | 2,961             | 0,403    | -1,087   |
| Q4                 | 739 | 1,53 | 0,956             | 0,584    | -0,262   |
| Valid N (listwise) | 739 |      |                   |          |          |

## B: Factor Analysis Q2

**Table S2.** Correlation matrix Q2.

|      | Q2.1  | Q2.2  | Q2.3  | Q2.4  | Q2.5  | Q2.6  | Q2.7  |
|------|-------|-------|-------|-------|-------|-------|-------|
| Q2.1 | 1     | 0.548 | 0.259 | 0.198 | 0.354 | 0.244 | 0.25  |
| Q2.2 | 0.548 | 1     | 0.379 | 0.269 | 0.442 | 0.288 | 0.267 |
| Q2.3 | 0.259 | 0.379 | 1     | 0.388 | 0.285 | 0.166 | 0.209 |
| Q2.4 | 0.198 | 0.269 | 0.388 | 1     | 0.323 | 0.191 | 0.224 |
| Q2.5 | 0.354 | 0.442 | 0.285 | 0.323 | 1     | 0.360 | 0.320 |
| Q2.6 | 0.244 | 0.288 | 0.166 | 0.191 | 0.360 | 1     | 0.301 |
| Q2.7 | 0.250 | 0.267 | 0.209 | 0.224 | 0.320 | 0.301 | 1     |

**Table S3.** KMO and Bartlett's Test Q2.

|                                                        |                                     |                    |       |
|--------------------------------------------------------|-------------------------------------|--------------------|-------|
| Kaiser-Meyer-Olkin<br>Measure of Sampling<br>Adequacy. |                                     |                    | 0.794 |
| Bartlett's Test of<br>Sphericity                       | Approx.<br>Chi-Square<br>df<br>Sig. | 999.722<br>21<br>0 |       |
| Cronbach's alpha<br>coefficient                        |                                     |                    | 0.723 |

**Table S4.** Communalities Q2.

|      | Communalities |
|------|---------------|
| Q2.1 | 0.766         |
| Q2.2 | 0.747         |
| Q2.3 | 0.681         |
| Q2.4 | 0.737         |
| Q2.5 | 0.533         |
| Q2.6 | 0.649         |
| Q2.7 | 0.573         |

**Table S5.** Total Variance Explained Q2.

| Component | Initial Eigenvalues |                  |                 | Rotation Sums of Squared Loadings |                  |                 |
|-----------|---------------------|------------------|-----------------|-----------------------------------|------------------|-----------------|
|           | Total               | % of<br>Variance | Cumulative<br>% | Total                             | % of<br>Variance | Cumulative<br>% |
| 1         | 2.818               | 40.256           | 40.256          | 1.691                             | 24.159           | 24.159          |
| 2         | 0.969               | 13.839           | 54.094          | 1.545                             | 22.066           | 46.225          |
| 3         | 0.900               | 12.857           | 66.951          | 1.451                             | 20.727           | 66.951          |
| 4         | 0.707               | 10.095           | 77.046          |                                   |                  |                 |
| 5         | 0.620               | 8.860            | 85.906          |                                   |                  |                 |
| 6         | 0.564               | 8.063            | 93.969          |                                   |                  |                 |
| 7         | 0.422               | 6.031            | 100             |                                   |                  |                 |

### C: Factor Analysis Q3

**Table S6.** Correlation matrix Q3.

|      | Q3.1  | Q3.2  | Q3.3  | Q3.4  | Q3.5  | Q3.6  | Q3.7  |
|------|-------|-------|-------|-------|-------|-------|-------|
| Q3.1 | 1.000 | .291  | .254  | .191  | .267  | .042  | 1.000 |
| Q3.2 | .291  | 1.000 | .556  | .568  | .372  | .030  | .291  |
| Q3.3 | .254  | .556  | 1.000 | .558  | .531  | .139  | .254  |
| Q3.4 | .191  | .568  | .558  | 1.000 | .429  | .079  | .191  |
| Q3.5 | .267  | .372  | .531  | .429  | 1.000 | .201  | .267  |
| Q3.6 | .042  | .030  | .139  | .079  | .201  | 1.000 | .042  |
| Q3.7 | .021  | .195  | .293  | .243  | .301  | .495  | .021  |

**Table S7.** KMO and Bartlett's Test Q3.

|                                                        |                       |          |       |
|--------------------------------------------------------|-----------------------|----------|-------|
| Kaiser-Meyer-Olkin<br>Measure of Sampling<br>Adequacy. |                       |          | 0.763 |
| Bartlett's Test of<br>Sphericity                       | Approx.<br>Chi-Square | 1338.518 |       |
|                                                        | df                    | 21       |       |
|                                                        | Sig.                  | 0        |       |
| Conbach's alpha<br>coefficient                         |                       |          | 0.729 |

**Table S8.** Communalities Q3.

|      | Communalities |
|------|---------------|
| Q3.1 | .958          |
| Q3.2 | .671          |
| Q3.3 | .701          |
| Q3.4 | .710          |
| Q3.5 | .540          |
| Q3.6 | .790          |
| Q3.7 | .734          |

**Table S9.** Total Variance Explained Q3.

| Component | Initial Eigenvalues |                  |                 | Rotation Sums of Squared Loadings |                  |                 |
|-----------|---------------------|------------------|-----------------|-----------------------------------|------------------|-----------------|
|           | Total               | % of<br>Variance | Cumulative<br>% | Total                             | % of<br>Variance | Cumulative<br>% |
| 1         | 2.871               | 41.021           | 41.021          | 2.487                             | 35.522           | 35.522          |
| 2         | 1.358               | 19.403           | 60.424          | 1.564                             | 22.344           | 57.865          |
| 3         | .874                | 12.489           | 72.914          | 1.053                             | 15.048           | 72.914          |
| 4         | .615                | 8.787            | 81.701          |                                   |                  |                 |
| 5         | .469                | 6.703            | 88.404          |                                   |                  |                 |

|   |      |       |         |
|---|------|-------|---------|
| 6 | .424 | 6.058 | 94.462  |
| 7 | .388 | 5.538 | 100.000 |

---

**D: Mediating effects**

**Table S10.** Model between Q1 and Q4.

|    | Model |    | Estimate | S.E.  | C.R.  |
|----|-------|----|----------|-------|-------|
| Q4 | <---  | Q1 | 0.251*** | 0.051 | 4.913 |

**Table S11.** Path Analysis of mediation model (Q2\_F1).

|       | Model |       | Estimate        | S.E.  | C.R.   |
|-------|-------|-------|-----------------|-------|--------|
| Q2_F1 | <---  | Q1    | 0.51***         | 0.051 | 10.088 |
| Q4    | <---  | Q1    | <b>0.192***</b> | 0.054 | 3.555  |
| Q4    | <---  | Q2_F1 | 0.115**         | 0.037 | 3.105  |

**Table S12.** Path Analysis of mediation model (Q3\_F1).

|       | Model |       | Estimate       | S.E.  | C.R.  |
|-------|-------|-------|----------------|-------|-------|
| Q3_F1 | <---  | Q1    | 0.331***       | 0.053 | 6.285 |
| Q4    | <---  | Q1    | <b>0.158**</b> | 0.050 | 3.153 |
| Q4    | <---  | Q3_F1 | 0.279***       | 0.034 | 8.193 |

### E: Moderating effects

**Table S13.** Moderating effect of age.

| Model                 | DF | CMIN   | P           | NFI<br>Delta-1 | IFI<br>Delta-2 | RFI<br>rho-1 | TLI<br>rho2 |
|-----------------------|----|--------|-------------|----------------|----------------|--------------|-------------|
| Structural<br>weights | 42 | 51.473 | <b>0.15</b> | 0.105          | 0.111          | -0.024       | -0.029      |

**Table S14.** Moderating effect of gender.

| Model                 | DF | CMIN   | P            | NFI<br>Delta-1 | IFI<br>Delta-2 | RFI<br>rho-1 | TLI<br>rho2 |
|-----------------------|----|--------|--------------|----------------|----------------|--------------|-------------|
| Structural<br>weights | 14 | 11.962 | <b>0.609</b> | 0.027          | 0.028          | -0.048       | -0.053      |
